# Supplementary material for: Volcanic contribution to decadal changes in tropospheric temperature
Source: Springer Nature journal article supplement (doi:10.1038/ngeo2098), 2014-02-21
Supplement: 41561_2014_BFngeo2098_MOESM198_ESM.pdf [file 41561_2014_BFngeo2098_MOESM198_ESM.pdf]

# Volcanic contribution to decadal changes in tropospheric temperature

## 1 Observational atmospheric temperature data

We used satellite measurements of atmospheric temperature change produced by RSS (ref. 13) and UAH (ref. 14). Both groups provide MSU-based estimates of vertically weighted, layer-average temperature changes for the temperature of the lower troposphere (TLT) and the temperature of the lower stratosphere (TLS). We analyzed MSU temperatures from data set versions 3.3 (RSS) and 5.5 (UAH). Observed MSU data were in the form of monthly means for the 408-month period January 1979 to December 2012, and are on a  $2.5^\circ \times 2.5^\circ$  latitude/longitude grid. RSS and UAH MSU data sets have small differences in spatial coverage at high latitudes (ref. 5). All near-global spatial averages of observed and simulated MSU temperatures were calculated over the area of common coverage in the RSS and UAH data ( $82.5^\circ\text{N}$  to  $70^\circ\text{S}$  for TLT, and  $82.5^\circ\text{N}$  to  $82.5^\circ\text{S}$  for TLS).

## 2 Observational sea-surface temperature data

We used data from version 3b of the NOAA Extended Reconstructed Sea Surface Temperature dataset (ERSST) (ref. 23) for calculating spatially-averaged SST changes over the Niño 3.4 region ( $5^\circ\text{N}$ - $5^\circ\text{S}$ ;  $170^\circ\text{W}$ - $120^\circ\text{W}$ ). ERSST data were available from January 1854 to December 2012 in the form of monthly means on a regular  $2^\circ \times 2^\circ$

latitude/longitude grid. Further details of the ERSST dataset are available online at <http://www.ncdc.noaa.gov/oa/climate/research/sst/ersstv3.php>.

### 3 Observational SAOD data

Observational stratospheric aerosol optical depth (SAOD) measurements were provided by Jean-Paul Vernier (NASA Langley Research Center) and Makiko Sato (NASA Goddard Institute for Space Studies). These are updated versions of the SAOD data sets described in previously published studies (ref. 24 and ref. 18).

#### 3.1 Vernier et al. SAOD

The Vernier monthly-mean SAOD data are in the form of zonal averages for 5° latitude bands, with coverage extending from 50°N-50°S. Data were available for the 336-month period from January 1985 to December 2012. The altitude range of the measurements is 15 to 40 km. Results are from three different sets of satellite-based aerosol measurements: 1) Stratospheric Aerosol and Gas Experiment, phase II (SAGE II; January 1985 to August 2005); 2) Global Ozone Monitoring by Occultation of Stars (GOMOS; September 2005 to May 2006); and 3) Cloud-Aerosol Lidar and Infrared Pathfinder Satellite Observations (CALIPSO; June 2006 to December 2012). Further discussion of these measurements and the SAOD signatures of 21st century volcanic eruptions is given elsewhere (refs. 1, 24, 25, 31).

## 3.2 Sato *et al.* SAOD

In the analyses presented in Supplementary Fig. 4A, we used version C of the Sato *et al.* SAOD data, which became available in May 2013. This version includes SAOD information from the satellite-based Optical Spectrograph and Infra-Red Imaging System (OSIRIS). The altitude range of the measurements is 15 to 35 km.

## 4 Observational SW data

In Fig. 2B, we used Edition 2.7 of the Energy Balance And Filled (EBAF) Clouds and Earth's Radiant Energy System (CERES) net clear-sky SW radiation data (ref. 26). The SW anomalies in Fig. 2B are defined with respect to climatological monthly means computed over the full 154-month period covered by the CERES EBAF data (March 2000 to February 2013, inclusive). We show clear-sky SW results to reduce obfuscating cloud effects. Focusing on net clear-sky SW radiation accounts for the effect of changes in the downwelling component of SW associated with changes in solar irradiance over the 11-year solar cycle.

## 5 Model simulation output

### 5.1 ALL+8.5 simulations

We analyze atmospheric temperature changes from CMIP-5 simulations with human, volcanic, and solar external forcings (ALL), and from CMIP-5 integrations with 21st

century changes in greenhouse gases and anthropogenic aerosols specified according to Representative Concentration Pathway 8.5 (RCP8.5). We spliced TLT information from the ALL simulations (which typically end in December 2005) with TLT results from the RCP8.5 runs. Splicing facilitates comparison of modelled and observed lower tropospheric temperature changes over the full observational satellite record. Spliced results are referred to subsequently as “ALL+8.5”.

We only consider ALL+8.5 simulations that incorporate the direct radiative effects of the El Chichón and Pinatubo volcanic aerosols. These were available for 28 different CMIP-5 models. Supplementary Tables 1-3 provide information on the models used in our analysis, the applied external forcings in the ALL simulations, the ALL and RCP8.5 start and end dates, and the splicing of the ALL and RCP8.5 runs.

### 5.1.1 Splicing of ALL and 8.5 temperature data

For 27 of the 28 CMIP-5 models analyzed here, the ALL synthetic MSU temperature changes were spliced together with RCP8.5 results. In the case of CNRM-CM5, there is a discontinuity in the volcanic aerosol forcing between the ALL and RCP8.5 simulations. This discontinuity is removed by splicing the CNRM-CM5 ALL and historicalExt simulations (ref. 5).

### 5.1.2 Treatment of different GISS-E2-R physics versions

For the GISS-E2-R ALL+8.5 simulations, output was available from three different model versions (p1, p2, and p3). In calculating ALL+8.5 multi-model averages, we treated atmospheric temperatures from the GISS-E2-R p1, p2 and p3 ALL+8.5 runs as results from three different models of the climate system rather than as different realizations of climate change performed with a similar physical model (ref. 5).

## 5.2 Vol21c simulations

For the GISS-E2-R (p3) and CanESM2 models, we also analyze output from integrations with updated post-Pinatubo volcanic aerosol forcing (“Vol21c”), as well as from simulations with 21st century greenhouse gas and anthropogenic aerosol forcing specified according to the RCP4.5 scenario.

### 5.2.1 GISS-E2-R (p3) simulations with volcanic forcing

The GISS-E2-R (p3) ALL+8.5 and ALL+4.5 runs rely on version A of the Sato *et al.* SAOD data set (ref. 18), which was available in 2009. Version A consisted of SAOD measurements spanning the period 1850 to 1999; SAOD was assumed to decay to zero by the end of 20th century<sup>1</sup>. In the GISS-E2-R (p3) Vol21c simulation, volcanic forcing is based on version C of Sato *et al.* Relative to version A, version C has more realistic treatment of the estimated observed SAOD changes from 1999 to

---

<sup>1</sup>Similar assumptions were made in the ALL+8.5 and ALL+4.5 simulations performed with all other CMIP-5 models analyzed here.

2012. The Vol21c simulation also includes updated solar forcing, with representation of the extended solar minimum during the last solar cycle (refs. 9, 32).

Five realizations of the Vol21c simulation were performed. Each realization was spawned from December 1990 conditions of a corresponding GISS-E2-R (p3) ALL realization<sup>2</sup>. Relative to the ALL+8.5 simulations, the GISS-E2-R (p3) spliced ALL+Vol21c runs differ in terms of their volcanic aerosols (post-1999), greenhouse gases and anthropogenic aerosols (post-2005), and solar irradiance changes (post-2000). The post-2005 changes in greenhouse gases and aerosol precursor emissions in Vol21c are the same as those used in the GISS-E2-R (p3) RCP4.5 runs.

We compared the GISS-E2-R (p3) ALL+Vol21c results with the corresponding five realizations of the spliced ALL+4.5 runs. Differences between the low-frequency TLT changes in ALL+Vol21c and ALL+4.5 arise because of differences in both volcanic aerosol forcing and solar forcing (see Supplementary Fig. 6A).

---

<sup>2</sup>We analyzed GISS-E2-R (p3) ALL, Vol21c, and RCP4.5 realizations r1i1p3, r2i1p3, r3i1p3, r4i1p3, and r5i1p3. Here, ‘corresponding’ signifies that Vol21c r1i1p3 and RCP4.5 r1i1p3 were both spawned from the end of the same realization (r1i1p3) of the GISS-E2-R (p3) ALL simulation (*etc.*)

### 5.2.2 CanESM2 simulations with volcanic forcing

The CanESM2 Vol21c simulations are described in Fyfe *et al.* (ref. 2). Five Vol21c realizations were available<sup>3</sup>; each was initiated from conditions taken from a different CanESM2 ALL realization on September 1, 1995. Prior to this date, the CanESM2 ALL realizations used version A of the Sato *et al.* volcanic aerosol forcing (see section 6.1). From September 1995 to 2011, SAOD was prescribed according to Vernier *et al.* (ref. 24). After 2011, it was assumed that SAOD increased by 5% per year<sup>4</sup>.

As in the case of the GISS-E2-R (p3) model, the greenhouse gas and anthropogenic aerosol forcings in the CanESM2 Vol21c simulation were specified according to RCP4.5. The comparison between the ALL+Vol21c and ALL+4.5 results isolates the impact of ‘updated’ volcanic aerosol forcing on TLT<sup>5</sup>. The CanESM2 ALL+4.5 (and ALL+8.5) simulations use the ‘original’ (version A) Sato *et al.* volcanic aerosol forcing, with an assumed decay of SAOD to near-zero values by the year 2000 (ref. 18).

<sup>3</sup>We analyzed five realizations (r1i1p1, r2i1p1, r3i1p1, r4i1p1, and r5i1p1) for each of the three CanESM2 numerical experiments (ALL, Vol21c, and RCP4.5).

<sup>4</sup>The ‘updated’ Vernier *et al.* SAOD estimates used here are slightly different from the Vernier *et al.* (2011) SAOD data used in the CanESM2 Vol21c simulations.

<sup>5</sup>Unlike the GISS-E2-R (p3) simulations described above, the CanESM2 ALL+Vol21c and ALL+4.5 runs do not differ in terms of their solar forcing.

## 6 Estimation of Equilibrium Climate Sensitivity

For the removal of volcano signals in the “ECS” case in Supplementary Fig. 3, it is necessary to compute the equilibrium climate sensitivity (ECS) of individual CMIP-5 models. ECS is calculated following a standard methodology (ref. 33), which is based on a global mean energy budget framework (ref. 34). This framework expresses the planetary energy budget as:

$$\Delta N = F - \alpha \Delta T \quad (1)$$

where  $\Delta N$  and  $\Delta T$  are anomalies<sup>6</sup> in global mean top of the atmosphere net radiation and surface air temperature, respectively. By regressing  $\Delta N$  on  $\Delta T$ , we obtain estimates of the adjusted radiative forcing  $F$  (the  $y$ -intercept) and the net feedback  $\alpha$  (the slope of the regression).

Because the  $4\times\text{CO}_2$  simulations analyzed here are not of sufficient length to achieve true equilibrium with the  $4\times\text{CO}_2$  forcing (at which time  $\Delta N$  would equal zero), we estimate ECS as  $F/\alpha$ . As is common practice, we divide these ECS values by 2 to obtain the equivalent estimate for a doubling of  $\text{CO}_2$ . The ECS results calculated here are in close agreement with those derived by (ref. 33), differing by less than 2% for each model.

---

<sup>6</sup>Anomalies are defined as differences between an abrupt  $4\times\text{CO}_2$  simulation and a corresponding pre-industrial control run.



## 7 Removal of ENSO and volcano signals

The method we use for statistical removal of ENSO and volcano signals from observational and model TLT and TMT data is described in detail elsewhere (refs. 20, 21). We provide a brief summary of the method below.

### 7.1 Method

Let  $T_t$  represent monthly-mean TLT data, spatially averaged over a selected domain, and  $X_t$  denote some specified index of ENSO variability. The nominal time index is  $t = 1, \dots, n_t$ , with  $n_t = 408$  in all of our applications (January 1979 through December 2012). Both  $T_t$  and  $X_t$  are in the form of anomalies with respect to their climatological monthly means over the full 408-month period.

Step 1: Select  $X_t, T_t$ , and a value of the volcanic signal decay time  $\tau$ . Values of  $\tau$  depend on both ocean thermal inertia and the Equilibrium Climate Sensitivity (ECS) (ref. 20). It is difficult to estimate  $\tau$  reliably from observations, because the long ‘tail’ of the volcanic signal is obscured by monthly and interannual noise, and by the temperature responses to slowly-varying non-volcanic forcings (refs. 20-22).

Here, we perform volcano signal removal in two ways: 1) using four different stipulated values of  $\tau$ ; and 2) with  $\tau$  values calculated from the individual equilibrium climate sensitivities of 22 CMIP-5 models. The stipulated values of  $\tau$  are 30, 35, 40, and 45 months, which correspond to sensitivities of approximately 1.0, 2.0, 3.5, and 5.8°C

(respectively). To compute  $\tau$  for individual models, we use the relationship given in Wigley *et al.* (ref. 20), which was derived with an upwelling-diffusion energy balance model:

$$\tau = 30(\Delta T_{2\times})^{0.23} \quad (2)$$

where  $\Delta T_{2\times}$  is the ECS for a doubling of pre-industrial atmospheric CO<sub>2</sub>.

Step 2: As a function of the lag  $k$  (in months) between  $X_t$  and  $T_t$ , compute the least-squares linear regression coefficient  $b_k$  between the selected ENSO index  $X_t$  and the tropospheric temperature time series  $T_t$ :

$$b_k = \frac{\sum_{t=1}^{n_t-k} [(X_t - \bar{X})(T_{t+k} - \bar{T})]}{\sum_{t=1}^{n_t-k} (X_t - \bar{X})^2} \quad k = 0, \dots, 24 \quad (3)$$

where  $\bar{X}$  and  $\bar{T}$  are the time-means of  $X_t$  and  $T_t$ , respectively. Then determine the lag  $j$  (in months) that maximizes  $|b_k|$ , with  $0 \leq j \leq 24$ . For observed TLT data,  $j$  is typically 3 months for tropical averages (20°N-20°S) and 5 months for near-global averages. Most CMIP-5 models yield similar lag estimates.

Step 3: Compute the linear influence of  $X_t$  on  $T_t$ :

$$E_{t+j} = a_j + b_j X_t \quad t = 1, \dots, n_t - j \quad (4)$$

where  $a_j$  is the regression estimate of the  $y$ -axis intercept at lag  $j$ .

Step 4: Subtract the ENSO effect from the raw temperature data:

$$Z_t = T_t - E_t \quad t = j + 1, \dots, n_t \quad (5)$$

Step 5: For each of the two volcanic eruptions considered (Pinatubo and El Chichón), use the ‘ENSO removed’  $Z_t$  data to estimate  $T_{\text{ref}}$ , the pre-eruption reference level temperature.  $T_{\text{ref}}$  is the average  $Z_t$  value over the  $t_{\text{base}}$  months prior to the eruption. We considered  $t_{\text{base}}$  values of 4 and 6 months. All of the results shown in the main text are for  $t_{\text{base}} = 6$  months. Note that  $T_{\text{ref}}$  is calculated using either smoothed or unsmoothed data (see Step 6).

Step 6: Estimate the volcano parameters  $\Delta T_{\text{max}}$  and  $t_{\text{ramp}}$  from the ‘ENSO removed’  $Z_t$  data. The maximum cooling  $\Delta T_{\text{max}}$  is:

$$\Delta T_{\text{max}} = T_{\text{ref}} - T_{t_{\text{ramp}}} \quad (6)$$

where  $t_{\text{ramp}}$  is the time (in months since the eruption month) at which  $\Delta T_{\text{max}}$  occurs. Here, we use  $t_{\text{ramp}} \leq 24$ , which restricts the search for  $\Delta T_{\text{max}}$  and  $t_{\text{ramp}}$  to the 24 months following each eruption. Larger values of  $t_{\text{ramp}}$  are physically unrealistic.

We estimate  $\Delta T_{\text{max}}$  and  $t_{\text{ramp}}$  from both unsmoothed and smoothed values of  $Z_t$ . In the presence of substantial high-frequency noise, it is useful to perform some degree of smoothing prior to calculation of  $\Delta T_{\text{max}}$  and  $t_{\text{ramp}}$ . We experimented with a variety of filters and cutoffs, but report only on the results obtained with a five-term binomial

filter. Filters with much longer cutoffs can yield excessive smoothing, and hence to underestimation of  $\Delta T_{\max}$ .

Step 7: Compute the volcano signal  $V_t$ , assuming linear cooling from the eruption month to  $t_{\text{ramp}}$  and exponential recovery thereafter:

$$\begin{aligned} V_t &= \frac{-\Delta T_{\max} t}{t_{\text{ramp}}} & t = t_1, \dots, t_{\text{ramp}} \\ &= -\Delta T_{\max} e^{-\frac{t-t_{\text{ramp}}}{\tau}} & t > t_{\text{ramp}} \end{aligned} \quad (7)$$

Step 8: Subtract the volcano signal from  $T_t$ , the original temperature data:

$$T_t^* = T_t - V_t \quad t = t_1, \dots, n_t \quad (8)$$

Step 9: Return to Step 2, but now operate on  $T_t^*$  rather than on the original temperature data,  $T_t$ . Continue iterating until there is convergence of the estimated volcano parameters and  $b_j$ . Convergence generally occurs within 4-5 iterations. All results presented here are for 10 iterations. The order in which ENSO and volcano effects are removed from  $T_t$  is generally irrelevant as long as sufficient iterations are performed.

Step 10: At the end of the iterative procedure, we subtract our final estimates of the ENSO and volcano signals from the original temperature data, yielding residuals  $\varepsilon_t$ :

$$\varepsilon_t = T_t - V_t - E_t \quad t = j + 1, \dots, n_t \quad (9)$$

## 8 Statistical significance of volcanic signals

We seek to assess the statistical significance of the observational results presented in Fig. 3 and in Supplementary Fig. 5. This involves addressing two different statistical questions. First, we identify 8 of the largest late 20th and early 21st century volcanic eruptions, and consider whether the TLT changes after each of these individual eruptions can be discriminated from the background noise of residual internally generated variability (*i.e.*, the noise remaining after statistical removal of ENSO-induced fluctuations in TLT). Second, we evaluate whether large negative values of correlations between 60-month segments of SAOD and TLT time series are statistically significant, or could be due to residual noise alone. We also consider whether the large positive correlations between 60-month segments of SAOD and SW time series are statistically significant<sup>7</sup>.

### 8.1 Significance tests for individual eruptions

Our significance testing strategy involves use of a standard lag-1 autoregressive statistical model (AR-1) to generate synthetic observational TLT time series:

$$x(t) = a_1x(t-1) + z(t) \quad ; \quad t = 1, \dots, n_t \quad (10)$$

---

<sup>7</sup>In other words, whether there is a significant relationship between volcanically-induced increases in SAOD and increases in net clear-sky SW radiation at the top of the atmosphere.

where  $x(t)$  is a single realization of synthetic TLT data,  $a_1$  is the coefficient of the AR-1 model, and  $z(t)$  is randomly-generated white noise (see ref. 35).

Here, we estimated  $a_1$  from the “ENSO removed” RSS TLT data during the 84-month volcanically-quiescent period from January 1998 to December 2004 (see Supplementary Fig. 4). The noise  $z(t)$  in equation (10) was scaled so that the temporal standard deviation of  $x(t)$  is approximately the same as that of the RSS residual TLT data during the volcanically-quiescent period mentioned above.

We generate 10,000 different realizations of  $x(t)$ . For each realization, and for each of the 8 selected eruptions in Fig. 3A, we calculate  $\Delta_{\text{TLT}}$ , the post-eruption change in TLT. To estimate  $\Delta_{\text{TLT}}$ , we difference the time averages over some specified number of months before and after the eruption. Time averaging damps some of the residual monthly variability which hampers reliable estimation of  $\Delta T_{\text{max}}$ .

Many different choices are possible for the number of months over which pre- and post-eruption temperatures are calculated ( $n_{\text{ref}}\{\text{TLT}\}$  and  $n_{\text{vol}}\{\text{TLT}\}$ , respectively). Here, we explore the following choices:

$$n_{\text{ref}}\{\text{TLT}\} = 1, 2, 3, 4;$$

$$n_{\text{vol}}\{\text{TLT}\} = 5, 6, 7$$

This yields 12  $\Delta_{\text{TLT}}$  estimates for each eruption. TLT values for the eruption month itself are used in computing the pre-eruption reference level temperature. Calculations of the post-eruption temperature changes only use data after the eruption month.

For  $n_{\text{ref}}\{\text{TLT}\} = 1$ , no time average is calculated, and the pre-eruption reference level temperature is simply the TLT anomaly for the eruption month<sup>8</sup>.

The maximum value of  $n_{\text{vol}}\{\text{TLT}\}$ , 7 months, is dictated by the close temporal proximity of the Merapi and Nabro eruptions. Nabro erupted in June 2011, roughly 7.5 months after the eruption of Merapi (see Supplementary Table 4). For values of  $n_{\text{vol}}\{\text{TLT}\}$  greater than 7 months, the estimated  $\Delta_{\text{TLT}}$  signal for Merapi would sample some of the cooling caused by Nabro<sup>9</sup>.

The observed values of  $\Delta_{\text{TLT}}$  are calculated in an analogous way, and are then compared (for each of the 8 eruptions considered, and for each of the 12 averaging period combinations) with the corresponding sampling distribution of 10,000 synthetic values of TLT changes. This allows us to compute empirical  $p$ -values for tests of the null hypothesis that residual internal variability alone could explain the observed values of  $\Delta_{\text{TLT}}$ . Values of  $\Delta_{\text{TLT}}$  estimated from the synthetic time series are Normally distributed, with mean zero. On average, therefore, the likelihood of “observing” post-eruption cooling in a synthetic time series (*i.e.*, of obtaining a negative value of  $\Delta_{\text{TLT}}$ ) is the same as the likelihood of “observing” warming after an eruption.

---

<sup>8</sup>Note that if an eruption occurs within 5 days of the end of a given month, the month following the eruption is designated as the eruption month. This is the case with two of the 8 eruptions we analyzed in Fig. 3A and Supplementary Fig. 5A (Manam and Merapi, which erupted on Jan. 27, 2005, and Oct. 26th, 2010, respectively).

<sup>9</sup>Because of the small period of time between Soufrière Hills and Tavurvur (less than 5 months) the former eruption was excluded from the analysis in Fig. 3A and Supplementary Fig. 5A.

The grey shaded areas in Fig. 3A and Supplementary Fig. 5A provide information on the statistical significance of the observed  $\Delta_{\text{TLT}}$  results. Symbols within the shaded area denote eruptions (and combinations of  $n_{\text{ref}}\{\text{TLT}\}$  and  $n_{\text{vol}}\{\text{TLT}\}$ ) with lower tropospheric cooling that is statistically significant at the 10% level or better. Given the large number of realizations, the null distributions of  $\Delta_{\text{TLT}}$  are virtually identical for different eruptions, but can show small differences for different pre- and post-eruption averaging period choices. This is why the upper boundary of the shaded region in Fig. 3A and Supplementary Fig. 5A is approximate. In practice, all observed  $\Delta_{\text{TLT}}$  results with  $p$ -values  $< 0.1$  (and no observed  $\Delta_{\text{TLT}}$  results with  $p$ -values  $> 0.1$ ) are within the shaded region.

The  $\Delta_{\text{SAOD}}$  changes in Fig. 3A and Supplementary Fig. 5A were calculated with the following averaging period choices (in months):

$$n_{\text{ref}}\{\text{SAOD}\} = 1, 2, 3, 4;$$

$$n_{\text{vol}}\{\text{SAOD}\} = 3, 4, 5$$

Because SAOD decays more rapidly than TLT after a volcanic eruption, we chose values of  $n_{\text{vol}}\{\text{SAOD}\}$  that are smaller than all but one of the  $n_{\text{vol}}\{\text{TLT}\}$  averaging period choices.



## 8.2 Significance tests of correlation coefficients

### 8.2.1 SAOD and TLT

We generate 10,000-member null distributions of  $r\{\text{SAOD, TLT}\}$  (the correlations between the observed SAOD and “ENSO removed” TLT data) using the synthetic TLT time series described in the previous section. We calculate both contemporaneous correlations and correlations with “ENSO removed” TLT lagging SAOD by either one or two months. Because of the lag between volcanic forcing and the temperature response of the bulk tropical or near-global troposphere, values of  $r\{\text{SAOD, TLT}\}$  during volcanically active periods are typically larger (*i.e.*, more negative) for lagged than for contemporaneous comparisons. We show only the two-month lagged  $r\{\text{SAOD, TLT}\}$  results in Fig. 3B and Supplementary Fig. 5B.

Synthetic TLT data are processed in the same way as the observational results: correlations are computed with overlapping 60-month segments of the observed SAOD and synthetic TLT time series. This yields a separate null distribution of  $r\{\text{SAOD, TLT}\}$  for each of the 60-month segments, and separate null distributions for the contemporaneous and lagged results. We then compare the observed  $r\{\text{SAOD, TLT}\}$  values with the appropriate null distribution, and estimate empirical  $p$ -values (shown on the alternate  $y$ -axis of Fig. 3B and Supplementary Fig. 5B).

## 8.2.2 SAOD and SW radiation

Assessment of statistical significance is very similar for values of  $r_{\{\text{SAOD, SW}\}}$ . There are three differences relative to the significance assessment for  $r_{\{\text{SAOD, TLT}\}}$  results. First, since the CERES SW radiation record commences in March 2000 (ref. ??), we use the shorter 48-month volcanically-quiet period from January 2001 to December 2004 for calculating  $a_1$  and scaling the noise  $z(t)$  in equation (10). Second, since ENSO explains  $< 5\%$  of the temporal variance of the CERES net clear-sky SW radiation data, ENSO effects were not removed from the CERES SW time series prior to estimating  $a_1$  and scaling  $z(t)$ . Third, because net clear-sky SW radiation at the top of the atmosphere responds very rapidly to the volcanically-induced SAOD changes, it is not necessary to lag SW relative to SAOD; all  $r_{\{\text{SAOD, SW}\}}$  results in Fig. 3B and Supplementary Fig. 5B are for contemporaneous correlations.

# 9 Discussion of results

## 9.1 Regression coefficients

Because of collinearity between the ENSO predictor variable and volcanically-induced TLT variability, the regression coefficient  $b_j$  between  $X_t$  and  $T_t$  can differ markedly from the  $b_j$  value calculated after the first iteration<sup>10</sup>. Consider the example of observational TLT data spatially averaged over 20°N-20°S, with  $\tau = 40$  months,  $t_{\text{base}} = 6$

---

<sup>10</sup>After the first iteration, the regression coefficient is calculated using  $X_t$  and  $T_t^*$  (see section 8.1).

months, and  $\Delta T_{\max}$  and  $t_{\text{ramp}}$  estimated from unsmoothed data. For RSS,  $b_j = 0.695$  after the first iteration, 0.796 after the second iteration, and 0.798 after the 10th iteration (with the lag  $j = 3$  months in each iteration). Ignoring collinearity yields an ENSO signal that explains less of the temporal variance of tropical TLT data.

## 9.2 Incomplete removal of volcano signals

The modelled and observed tropospheric temperature residuals after removal of ENSO and volcano signals,  $\varepsilon_t$ , are characterized by two small maxima. These maxima occur roughly 1-2 years after the peak cooling caused by El Chichón and Pinatubo (see Fig. 1C), and are probably related to incomplete removal of the El Chichón and Pinatubo cooling signals. Incomplete signal removal can occur for at least two reasons: 1) “contamination” of the Niño 3.4 SSTs used to estimate the ENSO TLT signal by volcanically-induced cooling (ref. 21); and 2) differences between the stipulated value of  $\tau$  (40 months for the 28 models in Fig. 1C) and each model’s actual value of  $\tau$ .

Supplementary Fig. 3 shows that if each individual model’s actual ECS value is used for calculating  $\tau$ , the above-mentioned twin maxima in  $\varepsilon_t$  are not removed. This suggests that the first effect (volcanic “contamination” of  $X_t$ ) is probably more important in explaining the residual maxima in  $\varepsilon_t$ .

### 9.3 Results from Vol21c simulations

After ENSO removal, the GISS-E2-R ensemble-mean TLT trend from 1998 to 2012 is  $0.175^{\circ}\text{C}/\text{decade}$  in the ALL+4.5 runs and  $0.171^{\circ}\text{C}/\text{decade}$  in the ALL+Vol21c simulations. The corresponding values are  $0.327^{\circ}\text{C}/\text{decade}$  and  $0.287^{\circ}\text{C}/\text{decade}$  for CanESM. Observed ‘ENSO removed’ TLT trends over the same time period are  $-0.016^{\circ}\text{C}/\text{decade}$  and  $0.071^{\circ}\text{C}/\text{decade}$  for RSS and UAH. As noted in the main text, including more realistic volcanic aerosol forcing reduces the discrepancy between the model and observed TLT trends over the hiatus period. The reduction is larger for CanESM (11-15%) than for GISS-E2-R (2-4%).

## References for Online Methods

31. Bourassa, A. E. *et al.* Large volcanic aerosol load in the stratosphere linked to Asian monsoon transport. *Science* **337**, 78-81 (2012).
32. Fröhlich, C. Observations of irradiance variations. *Space Sci. Rev.* **94**, 15-24 (2000).
33. Andrews, T., Gregory, J. M., Webb, M. J. & Taylor, K. E. Forcing, feedbacks and climate sensitivity in CMIP5 coupled atmosphere-ocean climate models. *Geophys. Res. Lett.* **39**, L09712, doi:10.1029/2012GL051607 (2012).
34. Gregory, J. M. *et al.* A new method for diagnosing radiative forcing and climate sensitivity. *Geophys. Res. Lett.* **31**, doi:10.1029/2003GL018747 (2004).
35. Santer, B. D. *et al.* Consistency of modelled and observed temperature trends in the tropical troposphere. *Int. J. Clim.* **28**, 1703-1722 (2008).

**Supplementary Figure 1:** Time series of simulated and observed monthly-mean near-global anomalies in the temperature of the lower stratosphere (TLS; panel A) and the lower troposphere (TLT; panel B). The stratospheric warming after the eruptions of El Chichón in 1982 and Pinatubo in 1991 occurs because volcanic aerosols absorb incoming solar and outgoing long-wave radiation; tropospheric cooling is caused by the aerosol-induced backscattering of solar radiation (refs. 17 and 19). Model results are from simulations with combined anthropogenic and natural external forcing (ALL+8.5). The bold lines denote the ALL+8.5 multi-model averages, calculated with the ensemble-mean temperature changes from 41 individual ALL+8.5 realizations (thin grey lines) performed with 28 CMIP-5 models. Observational results are from RSS (ref. 13) and UAH (ref. 14). Temperatures are averaged over the maximum common coverage between the RSS and UAH data sets (82.5°N-82.5°S for TLS, and 82.5°N-70°S for TLT). Anomalies are defined with respect to climatological monthly means over 1979 to 2012. Both models and observations show a large residual seasonal cycle in TLS, which is due to the pronounced seasonality in stratospheric ozone forcing (ref. 5).

**Supplementary Figure 2:** Removal of ENSO and volcano signals from observed lower tropospheric temperature data using an iterative regression-based method (refs. 20, 21). The example shown here relies on observed time series of monthly-mean changes in near-global TLT (panel A; ref. 13) and on SSTs averaged over the Niño 3.4 region (panel B; ref. 23). The estimate of the ENSO signal in TLT (panel C)

lags the Niño 3.4 SST time series by 5 months. Subtraction of the ENSO signal from the original TLT data reduces noise in the TLT response to the eruptions of El Chichón and Pinatubo (panel D). Values of the maximum volcanically-induced cooling ( $\Delta T_{\max}$ ) and the “ramp time” to attain maximum cooling ( $t_{\text{ramp}}$ ) are estimated from the ‘ENSO-removed’ data, using four different stipulated values of the signal decay time  $\tau$ . Volcanic signals are computed separately for El Chichón and Pinatubo (panel E). The El Chichón and Pinatubo signals are then removed from the original TLT data, and the ENSO signal is recalculated. Iteration continues until stable estimates of volcano and ENSO signals are obtained. The residuals after removal of El Chichón, Pinatubo, and ENSO signals are shown in panel F for  $\tau = 40$  months. See Supplementary Methods for further details.

**Supplementary Figure 3:** Time series of observed (panels A, C) and simulated (panels B, D) monthly-mean, near-global anomalies in the temperature of the lower troposphere after statistical removal of ENSO effects and the signals of El Chichón and Pinatubo. After subtraction of ENSO signals, values of  $\Delta T_{\max}$  and  $t_{\text{ramp}}$  were estimated from either unfiltered TLT data (panels A, B) or from TLT data smoothed with a five-term binomial filter to damp high-frequency noise (panels C, D). Volcanic signals were removed using four different stipulated values of the recovery time  $\tau$  (30, 35, 40, and 45 months). In each of these four cases, results are multi-model averages, calculated with 41 realizations of the ALL+8.5 simulation, performed with 28 different models. We also consider a fifth case, in which volcanic signal subtraction

relies on  $\tau$  values based on the equilibrium climate sensitivity (ECS) of individual CMIP-5 models. In the latter case, ECS estimates were available for 22 models only. Observations in panels A and C are from Remote Sensing Systems (ref. 13). All TLT results are for spatial averages over 82.5°N-70°S. Note that the discrepancy between modelled and observed TLT trends over 1998 to 2012 is relatively insensitive to uncertainties in  $\tau$ .

**Supplementary Figure 4:** Time series of observed changes in tropical SAOD (panel A) and TLT (panel B) over January 1985 to December 2012. The SAOD results are updated versions of the data published by Vernier *et al.* (ref. 24) and Sato *et al.* (ref. 18). The altitude ranges are 15 to 40 km for the Vernier *et al.* SAOD measurements and 15 to 35 km (the maximum vertical extent) for version C of the Sato *et al.* SAOD data. The ENSO signal in TLT was removed with the iterative regression-based method (refs. 20, 21) described in the Supplementary Methods. A stipulated 40-month decay time was used for estimating the tropospheric temperature signals of El Chichón and Pinatubo. All SAOD and TLT data are spatial averages over 20°N-20°S, except for the Sato *et al.* SAOD data, which were averaged over 23.5°N-23.5°S. The start dates of larger eruptions are identified by colored vertical lines; solid (dashed) lines denote eruptions occurring within (outside) the 20°N-20°S latitude band.



**Supplementary Figure 5:** As for Fig. 3 of main text, but for SAOD, TLT, and net clear-sky SW radiation spatially averaged over 50°N-50°S (the latitudinal extent of the updated Vernier *et al.* SAOD data; see ref. 24).

**Supplementary Figure 6:** The impact of including improved estimates of the post-Pinatubo volcanic aerosol forcing on the “warming hiatus”. The GISS-E2-R (p3) and CanESM2 models were used to perform simulations with updated volcanic aerosol forcing (“Vol21c”; panels A and B, respectively). In both sets of Vol21c integrations, post-2005 changes in anthropogenic greenhouse gas and aerosol concentrations are prescribed according to the RCP4.5 scenario. To evaluate the impact of more realistic treatment of post-Pinatubo volcanic forcing, we compared the spliced ALL+Vol21c results with maximally-overlapping 10-year TLT trends from the spliced ALL+RCP4.5 simulations (see Supplementary Methods). Five realizations of the ALL+Vol21c and ALL+RCP4.5 simulations were available for each of the two models. The bold lines denote ensemble means. All model and observational results use  $\tau = 40$  months for removing ENSO signals.

### Lower Stratospheric and Lower Tropospheric Temperature Anomalies

Reference period: 1979-2012. Spatial averages: 82.5°N-82.5°S (TLS). 82.5°N-70°S (TLT)

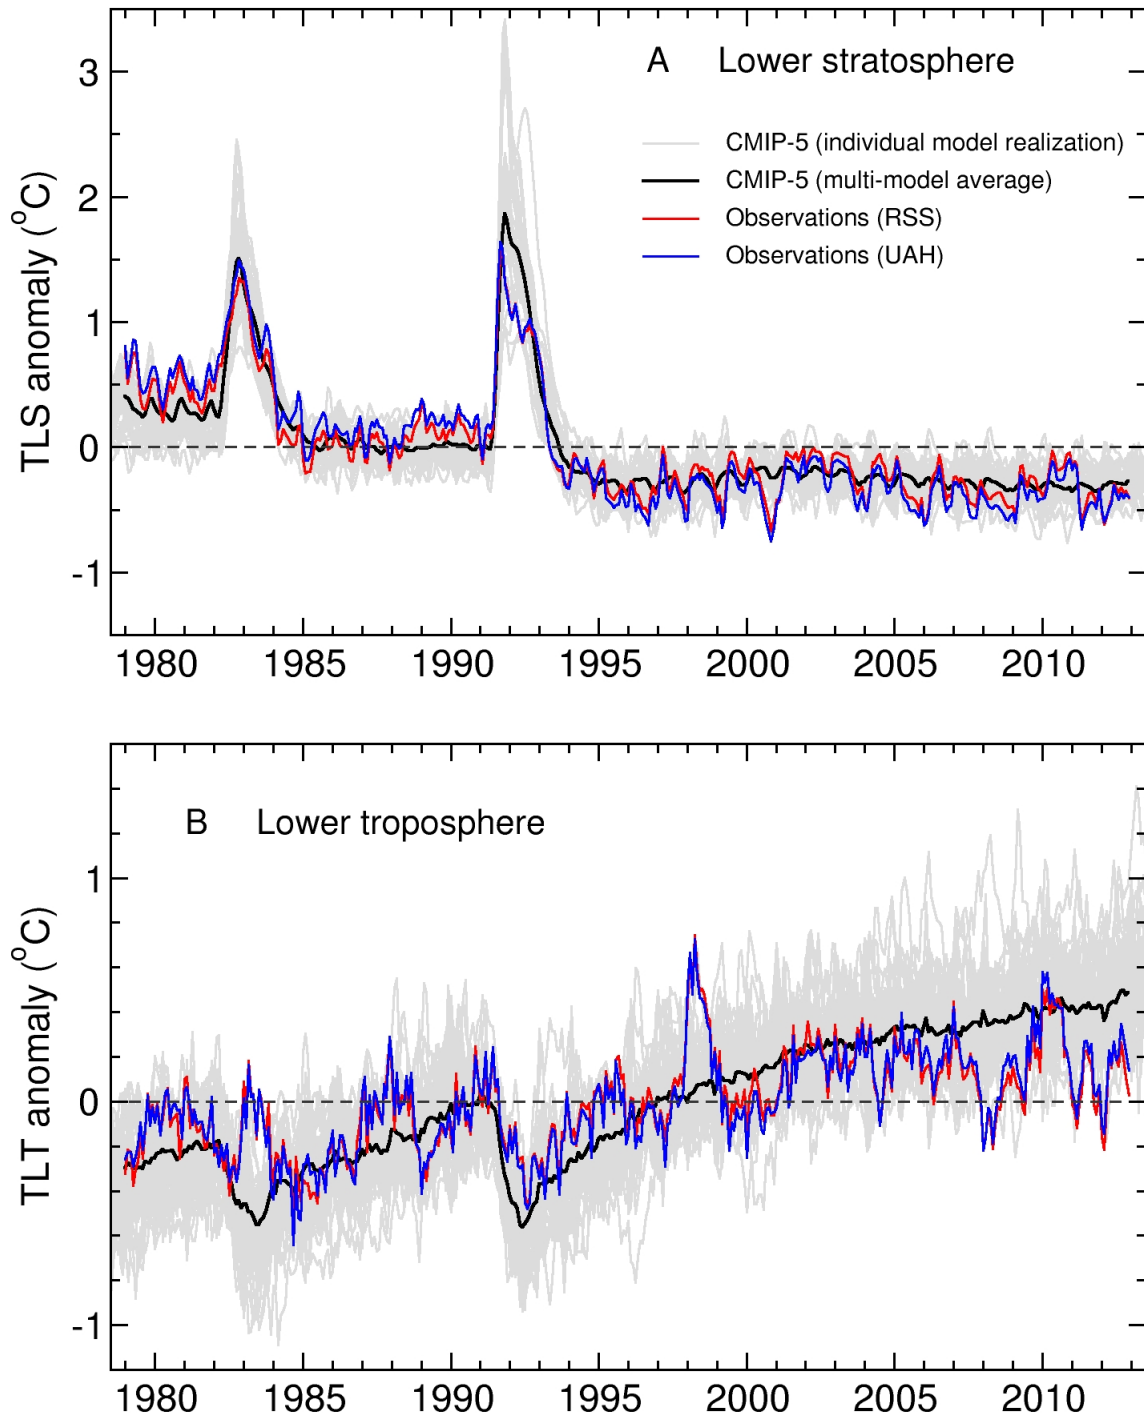

Supplementary Figure 1: Santer et al.

### Estimated ENSO and Volcano Signals in Observed TLT Data

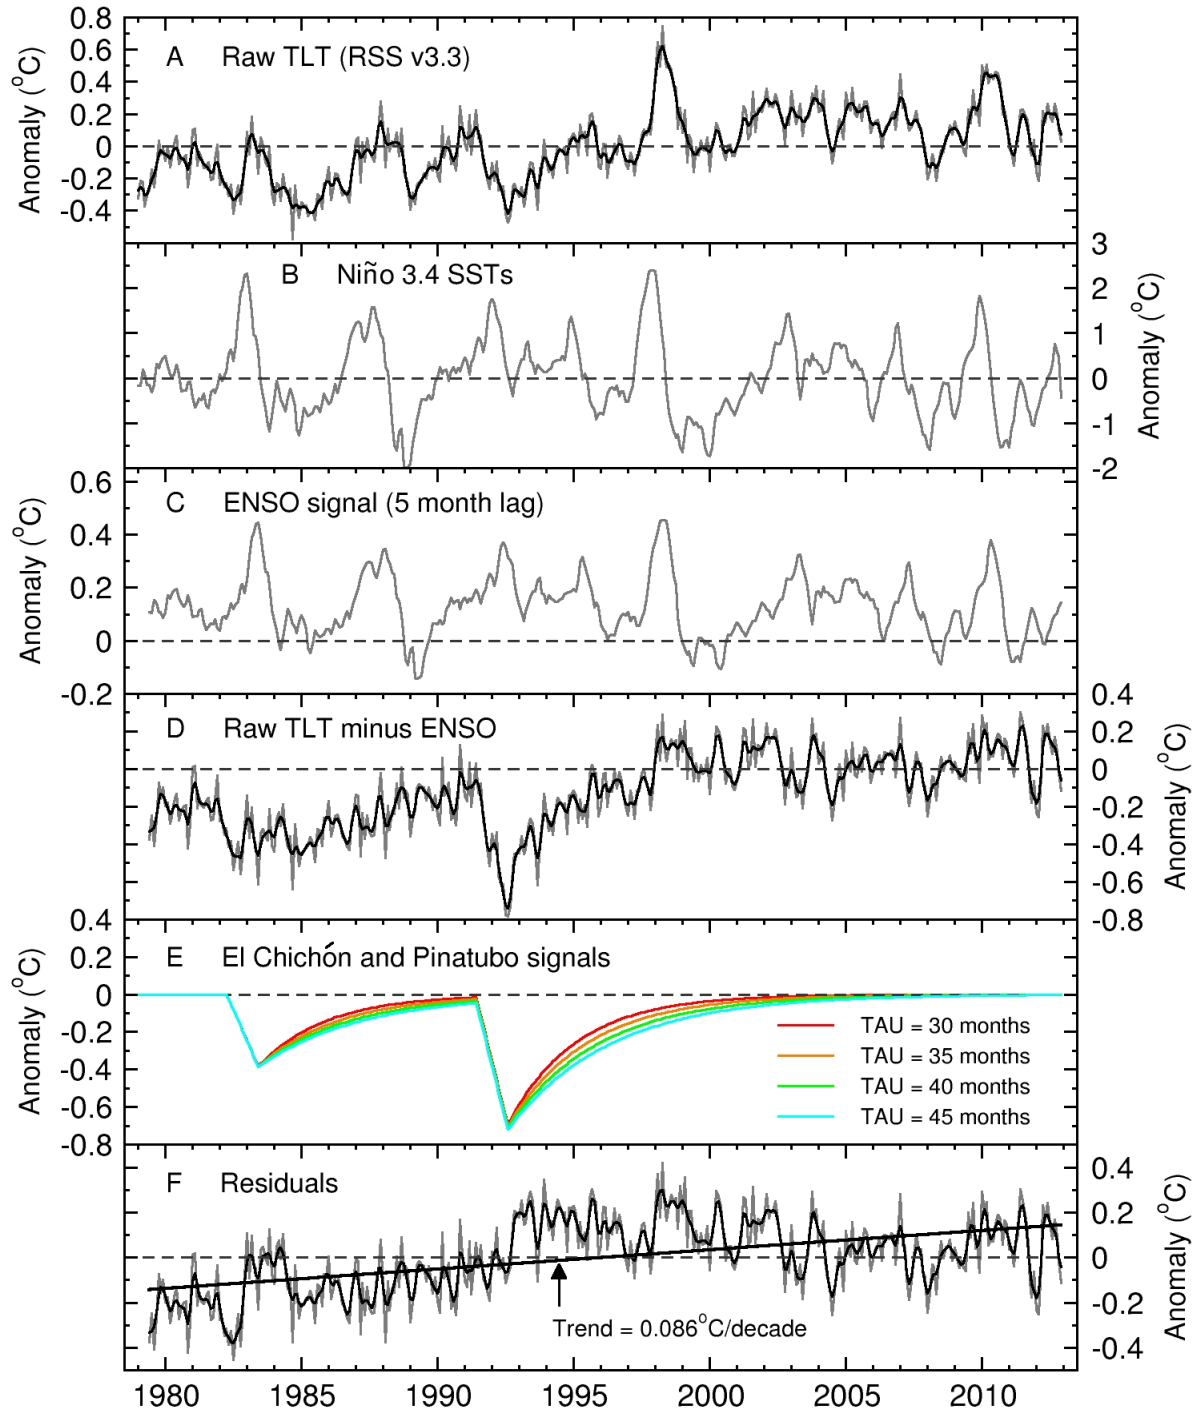

# Sensitivity of Observed and Simulated TLT Residuals to Uncertainties in TAU

Near-global TLT (82.5°N-70°S). ENSO and volcano signals removed

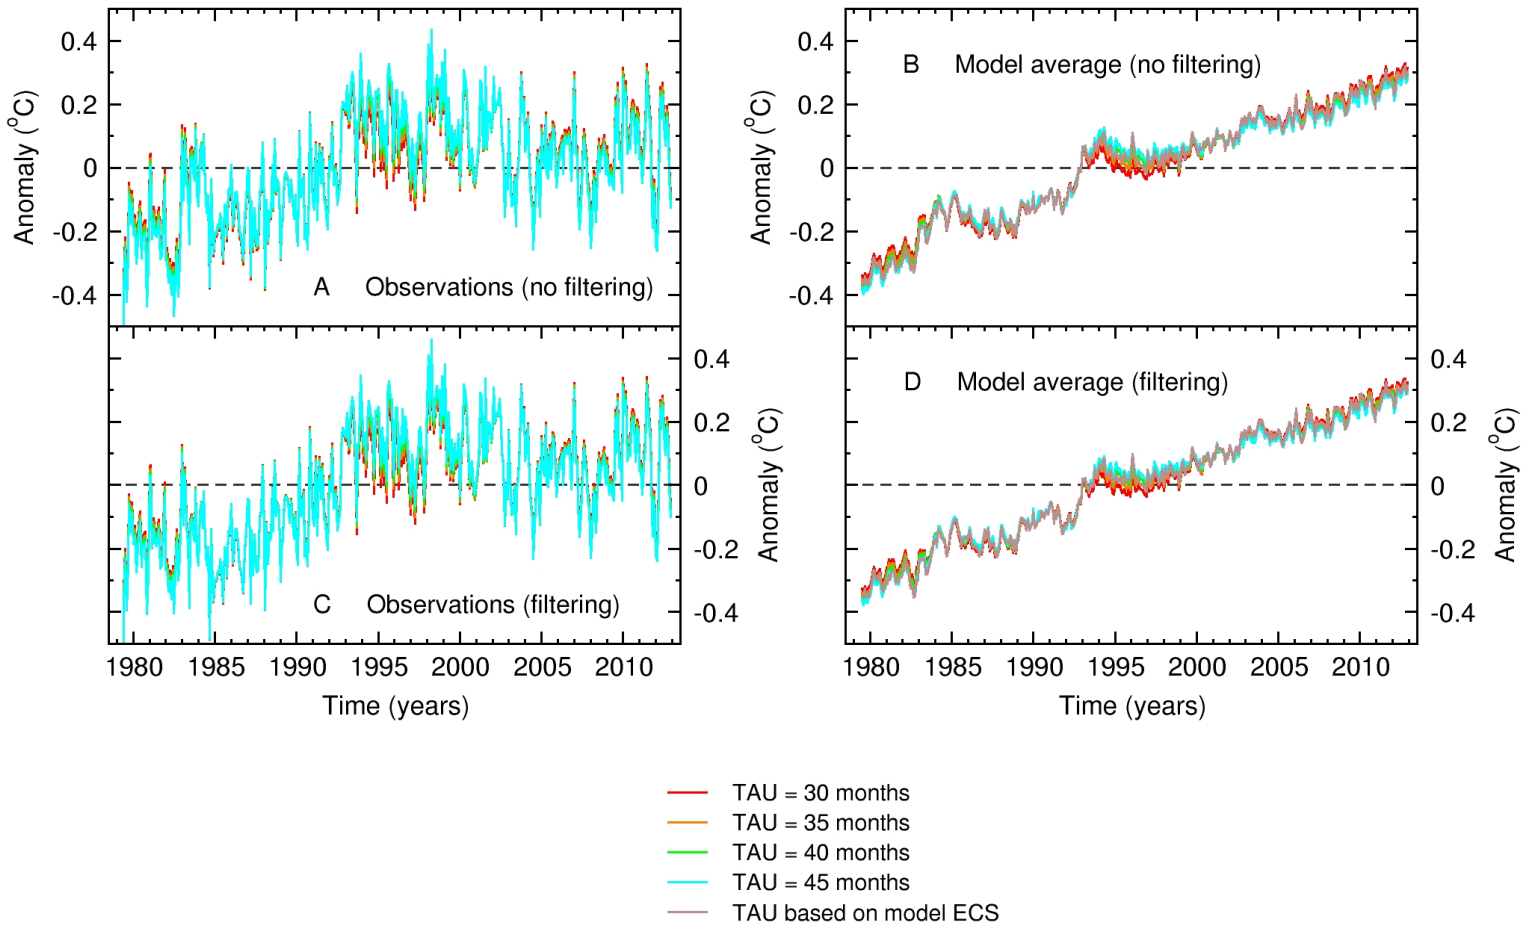

Supplementary Figure 3: Santer *et al.*

### Effect of Recent Volcanic Eruptions on Atmospheric Temperature Tropical averages (20°N-20°S)

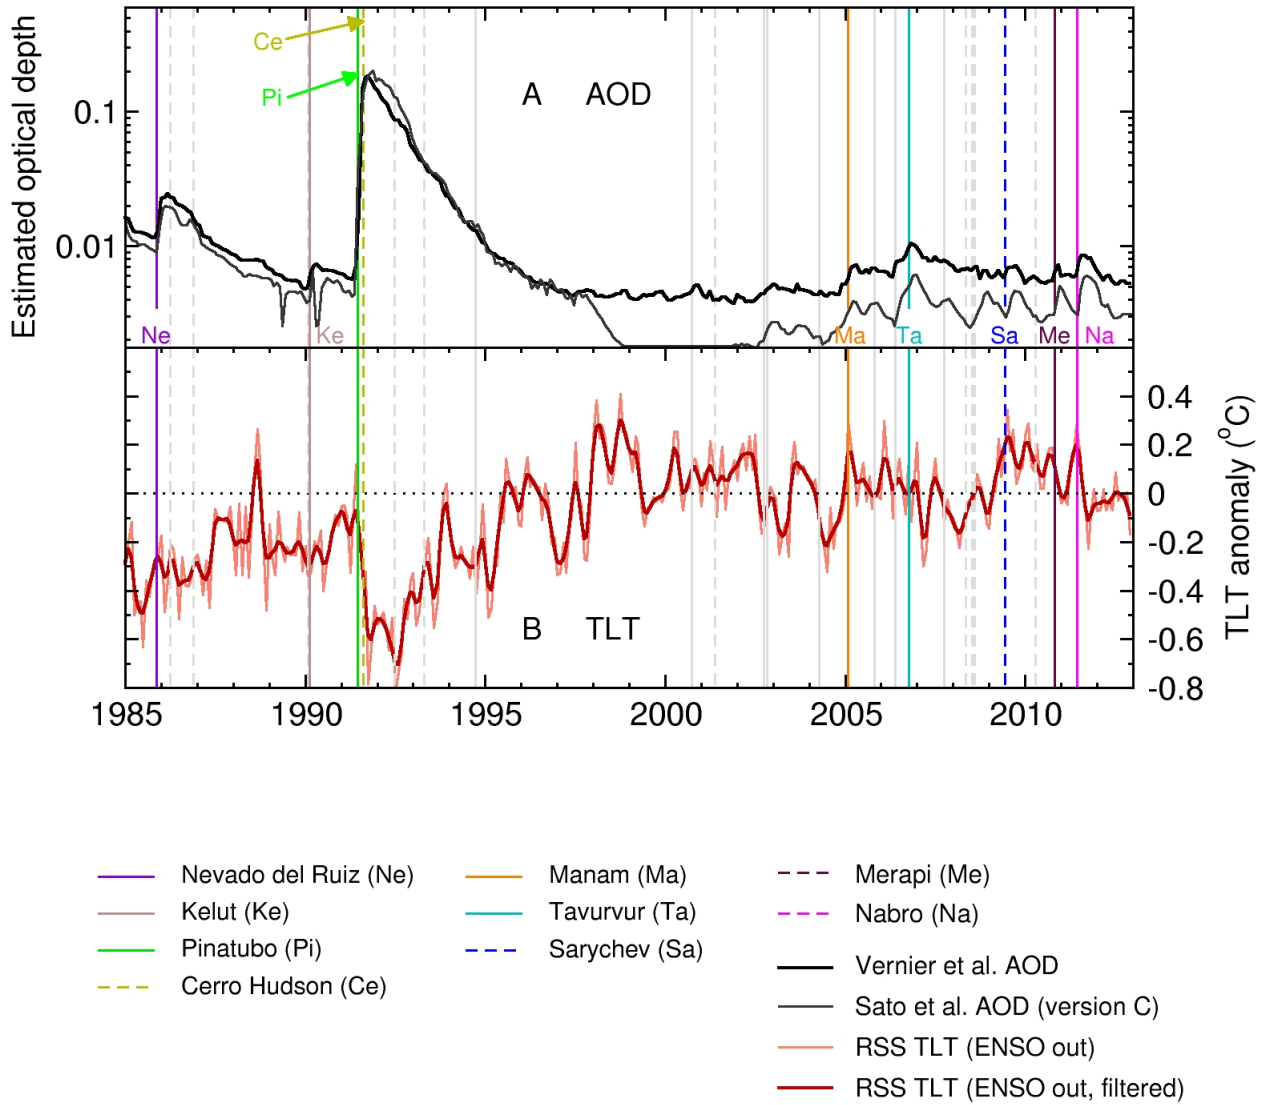

Supplementary Figure 4: Santer et al.

Significance of Observed Near-Global Climate Signals After Volcanic Eruptions

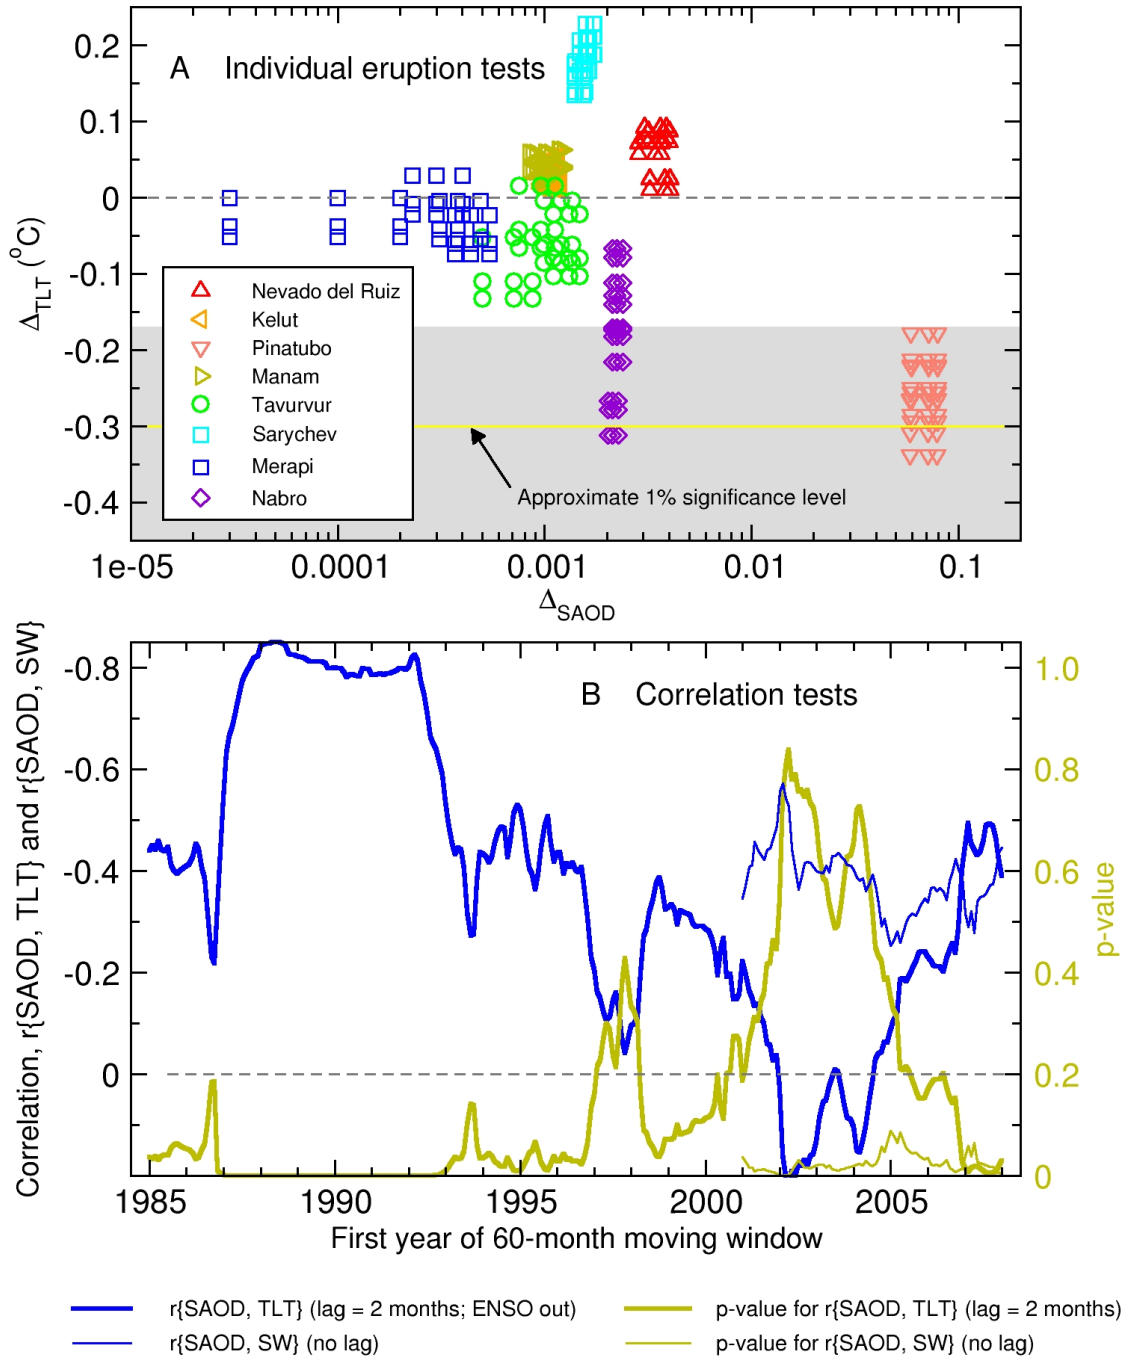

Supplementary Figure 5: Santer et al.

# Impact of Estimated Post-Pinatubo Volcanic Forcing on TLT Trends

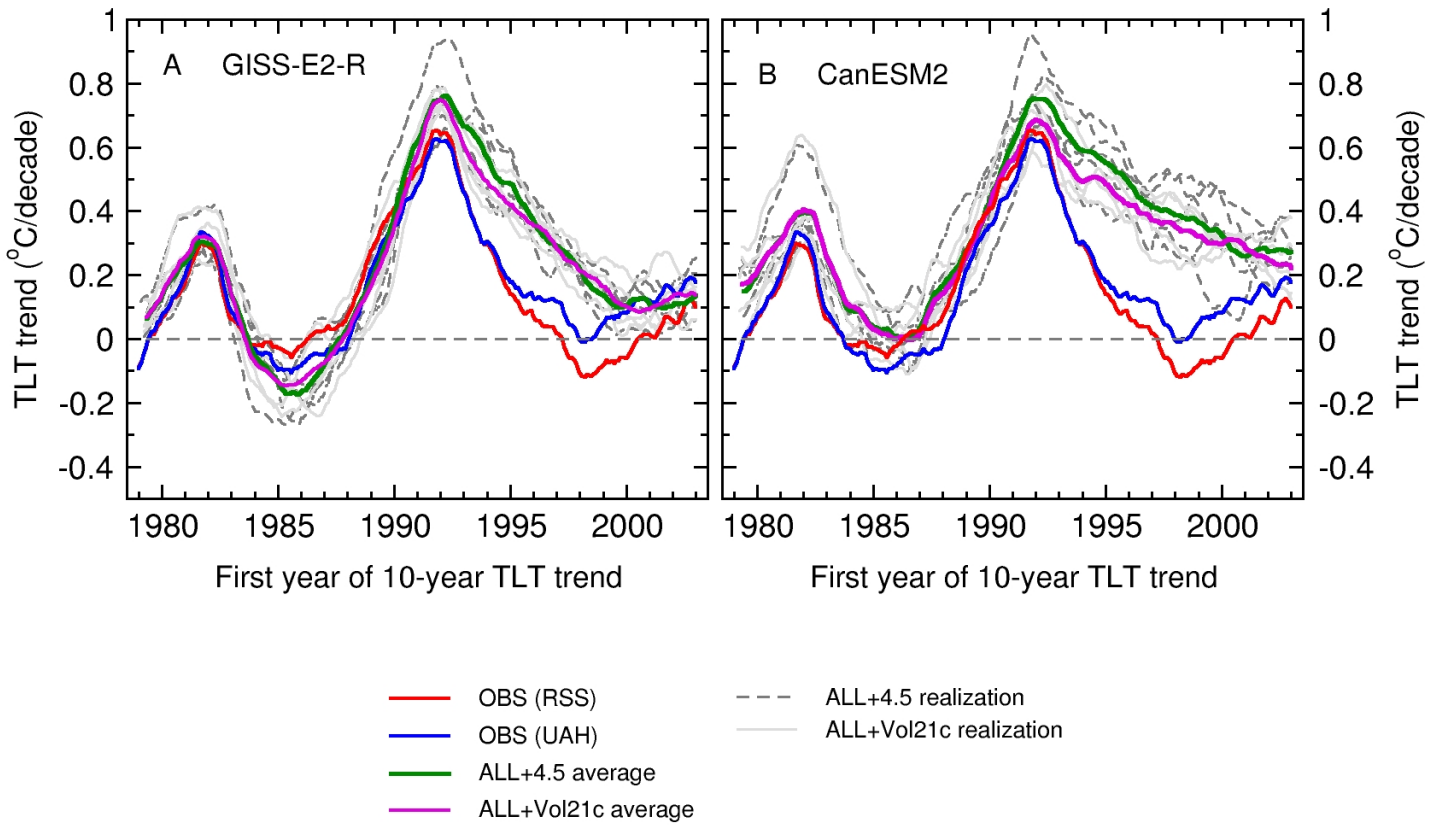

Supplementary Table 1: Modelling center information and official acronyms of the CMIP-5 models used in this study.

|    | <b>Model</b>   | <b>Country</b> | <b>Modeling center</b>                                                                                                            |
|----|----------------|----------------|-----------------------------------------------------------------------------------------------------------------------------------|
| 1  | ACCESS1.0      | Australia      | Commonwealth Scientific and Industrial Research Organization and Bureau of Meteorology                                            |
| 2  | ACCESS1.3      | Australia      | Commonwealth Scientific and Industrial Research Organization and Bureau of Meteorology                                            |
| 3  | BCC-CSM1.1     | China          | Beijing Climate Center, China Meteorological Administration                                                                       |
| 4  | BCC-CSM1.1(m)  | China          | Beijing Climate Center, China Meteorological Administration                                                                       |
| 5  | CanESM2        | Canada         | Canadian Centre for Climate Modelling and Analysis                                                                                |
| 6  | CCSM4          | USA            | National Center for Atmospheric Research                                                                                          |
| 7  | CESM1(BGC)     | USA            | National Science Foundation, U.S. Dept. of Energy, National Center for Atmospheric Research                                       |
| 8  | CESM1(CAM5)    | USA            | National Science Foundation, U.S. Dept. of Energy, National Center for Atmospheric Research                                       |
| 9  | CNRM-CM5       | France         | Centre National de Recherches Meteorologiques / Centre Européen de Recherche et Formation Avancées en Calcul Scientifique         |
| 10 | CSIRO-Mk3.6.0  | Australia      | Commonwealth Scientific and Industrial Research Organization in collaboration with Queensland Climate Change Centre of Excellence |
| 11 | EC-EARTH       | Various        | EC-EARTH consortium                                                                                                               |
| 12 | GFDL-CM3       | USA            | NOAA Geophysical Fluid Dynamics Laboratory                                                                                        |
| 13 | GFDL-ESM2G     | USA            | NOAA Geophysical Fluid Dynamics Laboratory                                                                                        |
| 14 | GFDL-ESM2M     | USA            | NOAA Geophysical Fluid Dynamics Laboratory                                                                                        |
| 15 | GISS-E2-H (p1) | USA            | NASA Goddard Institute for Space Studies                                                                                          |



Supplementary Table 1: Modelling center information and official acronyms of the CMIP-5 models used in this study (continued).

|    | <b>Model</b>   | <b>Country</b> | <b>Modeling center</b>                                                                                                                                                    |
|----|----------------|----------------|---------------------------------------------------------------------------------------------------------------------------------------------------------------------------|
| 16 | GISS-E2-R (p1) | USA            | NASA Goddard Institute for Space Studies                                                                                                                                  |
| 17 | GISS-E2-R (p2) | USA            | NASA Goddard Institute for Space Studies                                                                                                                                  |
| 18 | GISS-E2-R (p3) | USA            | NASA Goddard Institute for Space Studies                                                                                                                                  |
| 19 | HadGEM2-CC     | UK             | Met. Office Hadley Centre                                                                                                                                                 |
| 20 | HadGEM2-ES     | UK             | Met. Office Hadley Centre                                                                                                                                                 |
| 21 | MIROC5         | Japan          | Atmosphere and Ocean Research Institute (the University of Tokyo), National Institute for Environmental Studies, and Japan Agency for Marine-Earth Science and Technology |
| 22 | MIROC-ESM-CHEM | Japan          | Japan Agency for Marine-Earth Science and Technology, Atmosphere and Ocean Research Institute (the University of Tokyo), and National Institute for Environmental Studies |
| 23 | MIROC-ESM      | Japan          | Japan Agency for Marine-Earth Science and Technology, Atmosphere and Ocean Research Institute (the University of Tokyo), and National Institute for Environmental Studies |
| 24 | MPI-ESM-LR     | Germany        | Max Planck Institute for Meteorology                                                                                                                                      |
| 25 | MPI-ESM-MR     | Germany        | Max Planck Institute for Meteorology                                                                                                                                      |
| 26 | MRI-CGCM3      | Japan          | Meteorological Research Institute                                                                                                                                         |
| 27 | NorESM1-M      | Norway         | Norwegian Climate Centre                                                                                                                                                  |
| 28 | NorESM1-ME     | Norway         | Norwegian Climate Centre                                                                                                                                                  |

Supplementary Table 2: External forcings in the historical simulations of the CMIP-5 models used in this study. Information was extracted from the global attribute named “forcing” in the metadata of the relevant NetCDF files<sup>1</sup>.

| Model             | Forcing information from metadata                        |
|-------------------|----------------------------------------------------------|
| 1 ACCESS1.0       | GHG, Oz, SA, Sl, Vl, BC, OC <sup>2</sup>                 |
| 2 ACCESS1.3       | GHG, Oz, SA, Sl, Vl, BC, OC <sup>2</sup>                 |
| 3 BCC-CSM1.1      | Nat, Ant, GHG, SD, Oz, Sl, Vl, SS, Ds, BC, OC            |
| 4 BCC-CSM1.1(m)   | Nat, Ant, GHG, SD, Oz, Sl, Vl, SS, Ds, BC, OC            |
| 5 CanESM2         | GHG, Oz, SA, BC, OC, LU, Sl, Vl                          |
| 6 CCSM4           | Sl, GHG, Vl, SS, Ds, SD, BC, MD, OC, Oz, AA, LU          |
| 7 CESM1-BGC       | Sl, GHG, Vl, SS, Ds, SD, BC, MD, OC, Oz, AA, LU          |
| 8 CESM1-CAM5      | Sl, GHG, Vl, SS, Ds, SD, BC, MD, OC, Oz, AA, LU          |
| 9 CNRM-CM5        | GHG, SA, Sl, Vl, BC, OC <sup>3</sup>                     |
| 10 CSIRO-Mk3.6.0  | Ant, Nat                                                 |
| 11 EC-EARTH       | Nat, Ant                                                 |
| 12 GFDL-CM3       | GHG, SA, Oz, LU, Sl, Vl, SS, BC, MD, OC <sup>4</sup>     |
| 13 GFDL-ESM2G     | GHG, SD, Oz, LU, Sl, Vl, SS, BC, MD, OC <sup>5</sup>     |
| 14 GFDL-ESM2M     | GHG, SD, Oz, LU, Sl, Vl, SS, BC, MD, OC <sup>5</sup>     |
| 15 GISS-E2-H (p1) | GHG, LU, Sl, Vl, BC, OC, SA, Oz <sup>6</sup>             |
| 16 GISS-E2-R (p1) | GHG, LU, Sl, Vl, BC, OC, SA, Oz <sup>6</sup>             |
| 17 GISS-E2-R (p2) | GHG, LU, Sl, Vl, BC, OC, SA, Oz <sup>6</sup>             |
| 18 GISS-E2-R (p3) | GHG, LU, Sl, Vl, BC, OC, SA, Oz <sup>6</sup>             |
| 19 HadGEM2-CC     | GHG, Oz, SA, LU, Sl, Vl, BC, OC                          |
| 20 HadGEM2-ES     | GHG, SA, Oz, LU, Sl, Vl, BC, OC <sup>7</sup>             |
| 21 MIROC5         | GHG, SA, Oz, LU, Sl, Vl, SS, Ds, BC, MD, OC <sup>8</sup> |

Supplementary Table 2 (continued): External forcings in the historical simulations of the CMIP-5 models used in this study.

| Model             | Forcing information from metadata            |
|-------------------|----------------------------------------------|
| 22 MIROC-ESM-CHEM | GHG, SA, Oz, LU, SI, VI, MD, BC, OC          |
| 23 MIROC-ESM      | GHG, SA, Oz, LU, SI, VI, MD, BC, OC          |
| 24 MPI-ESM-LR     | GHG, Oz, SD, SI, VI, LU                      |
| 25 MPI-ESM-MR     | GHG, Oz, SD, SI, VI, LU                      |
| 26 MRI-CGCM3      | GHG, SA, Oz, LU, SI, VI, BC, OC <sup>9</sup> |
| 27 NorESM1-M      | GHG, SA, Oz, SI, VI, BC, OC                  |
| 28 NorESM1-ME     | GHG, SA, Oz, SI, VI, BC, OC                  |

<sup>1</sup>Forcing abbreviations are described in Appendix 1.2 of the CMIP-5 Data Reference Syntax document. Nat = natural forcing (a combination, not explicitly defined); Ant = anthropogenic forcing (a combination, not explicitly defined); GHG = well-mixed greenhouse gases; SD = anthropogenic sulfate aerosol (direct effects only); SI = anthropogenic sulfate aerosol (indirect effects only); SA = anthropogenic sulfate aerosol direct and indirect effects; Oz = tropospheric and stratospheric ozone; LU = land-use change; Sl = solar irradiance; VI = volcanic aerosol; SS = sea salt; Ds = dust; BC = black carbon; MD = mineral dust; OC = organic carbon; AA = anthropogenic aerosols (a mixture of aerosols, not explicitly defined).

<sup>2</sup>GHG = CO<sub>2</sub>, N<sub>2</sub>O, CH<sub>4</sub>, CFC11, CFC12, CFC113, HCFC22, HFC125, HFC134a.

<sup>3</sup>Although stratospheric ozone forcing is not listed in the forcing metadata, chlorine concentration is an input for the prognostic ozone scheme of the CNRM-CM5 model. So according to the CMIP-5 Data Reference Syntax document, stratospheric ozone should have been listed as an external forcing.

<sup>4</sup>GHG includes CO<sub>2</sub>, CH<sub>4</sub>, N<sub>2</sub>O, CFC11, CFC12, HCFC22, and CFC113. Aerosol direct and indirect effects are included.

<sup>5</sup>GHG includes CO<sub>2</sub>, CH<sub>4</sub>, N<sub>2</sub>O, CFC11, CFC12, HCFC22, and CFC113. “The direct effect of tropospheric aerosols is calculated by the model, but not the indirect effects.”

<sup>6</sup>Also includes orbital change, BC on snow, and nitrate aerosols.

<sup>7</sup>GHG = CO<sub>2</sub>, N<sub>2</sub>O, CH<sub>4</sub>, CFCs.

<sup>8</sup>GHG includes CO<sub>2</sub>, N<sub>2</sub>O, CH<sub>4</sub>, and CFCs; Oz includes OH and H<sub>2</sub>O<sub>2</sub>; LU excludes change in lake fraction.

<sup>9</sup>GHG includes CO<sub>2</sub>, CH<sub>4</sub>, N<sub>2</sub>O, CFC-11, CFC-12, and HCFC-22.

Supplementary Table 3: Start dates, end dates, and lengths ( $N_m$ , in months) of the CMIP-5 historical and RCP8.5 simulations used in this study. EM is the “ensemble member” identifier described in the CMIP-5 Data Reference Syntax document<sup>1</sup>.

| Model            | EM      | Hist. Start | Hist. End | Hist. $N_m$ | RCP8.5 Start | RCP8.5 End | RCP8.5 $N_m$ |
|------------------|---------|-------------|-----------|-------------|--------------|------------|--------------|
| 1 ACCESS1.0      | r1i1p1  | 1850-01     | 2005-12   | 1872        | 2006-01      | 2100-12    | 1140         |
| 2 ACCESS1.3      | r1i1p1  | 1850-01     | 2005-12   | 1872        | 2006-01      | 2100-12    | 1140         |
| 3 BCC-CSM1.1     | r1i1p1  | 1850-01     | 2012-12   | 1956        | 2006-01      | 2300-12    | 3540         |
| 4 BCC-CSM1.1(m)  | r1i1p1  | 1850-01     | 2012-12   | 1956        | 2006-01      | 2099-12    | 1128         |
| 5 CanESM2        | r1i1p1  | 1850-01     | 2005-12   | 1872        | 2006-01      | 2100-12    | 1140         |
| 6 CanESM2        | r2i1p1  | 1850-01     | 2005-12   | 1872        | 2006-01      | 2100-12    | 1140         |
| 7 CanESM2        | r3i1p1  | 1850-01     | 2005-12   | 1872        | 2006-01      | 2100-12    | 1140         |
| 8 CanESM2        | r4i1p1  | 1850-01     | 2005-12   | 1872        | 2006-01      | 2100-12    | 1140         |
| 9 CanESM2        | r5i1p1  | 1850-01     | 2005-12   | 1872        | 2006-01      | 2100-12    | 1140         |
| 10 CCSM4         | r1i1p1  | 1850-01     | 2005-12   | 1872        | 2006-01      | 2100-12    | 1140         |
| 11 CCSM4         | r2i1p1  | 1850-01     | 2005-12   | 1872        | 2006-01      | 2100-12    | 1140         |
| 12 CCSM4         | r3i1p1  | 1850-01     | 2005-12   | 1872        | 2006-01      | 2100-12    | 1140         |
| 13 CESM1-BGC     | r1i1p1  | 1850-01     | 2005-12   | 1872        | 2006-01      | 2100-12    | 1140         |
| 14 CESM1-CAM5    | r1i1p1  | 1850-01     | 2005-12   | 1872        | 2006-01      | 2100-12    | 1140         |
| 15 CNRM-CM5      | r1i1p1  | 1850-01     | 2005-12   | 1872        | 2006-01      | 2300-12    | 3540         |
| 16 CNRM-CM5      | r2i1p1  | 1850-01     | 2005-12   | 1872        | 2006-01      | 2100-12    | 1140         |
| 17 CNRM-CM5      | r4i1p1  | 1850-01     | 2005-12   | 1872        | 2006-01      | 2100-12    | 1140         |
| 18 CSIRO-Mk3.6.0 | r10i1p1 | 1850-01     | 2005-12   | 1872        | 2006-01      | 2100-12    | 1140         |
| 19 EC-EARTH      | r8i1p1  | 1850-01     | 2012-12   | 1956        | 2006-01      | 2100-12    | 1140         |
| 20 GFDL-CM3      | r1i1p1  | 1860-01     | 2005-12   | 1752        | 2006-01      | 2100-12    | 1140         |
| 21 GFDL-ESM2G    | r1i1p1  | 1861-01     | 2005-12   | 1740        | 2006-01      | 2100-12    | 1140         |
| 22 GFDL-ESM2M    | r1i1p1  | 1861-01     | 2005-12   | 1740        | 2006-01      | 2100-12    | 1140         |

Supplementary Table 3 (continued): Start dates, end dates, and lengths of the CMIP-5 historical and RCP8.5 simulations used in this study.

|    | Model          | EM     | Hist. Start | Hist. End | Hist. (months) | RCP8.5 Start | RCP8.5 End | RCP8.5 (months) |
|----|----------------|--------|-------------|-----------|----------------|--------------|------------|-----------------|
| 23 | GISS-E2-H (p1) | r1i1p1 | 1850-01     | 2005-12   | 1872           | 2006-01      | 2300-12    | 3540            |
| 24 | GISS-E2-R (p1) | r1i1p1 | 1850-01     | 2005-12   | 1872           | 2006-01      | 2300-12    | 3540            |
| 25 | GISS-E2-R (p2) | r1i1p2 | 1850-01     | 2005-12   | 1872           | 2006-01      | 2300-12    | 3540            |
| 26 | GISS-E2-R (p3) | r1i1p3 | 1850-01     | 2005-12   | 1872           | 2006-01      | 2300-12    | 3540            |
| 27 | HadGEM2-CC     | r1i1p1 | 1859-12     | 2005-11   | 1752           | 2005-12      | 2099-12    | 1129            |
| 28 | HadGEM2-CC     | r2i1p1 | 1959-12     | 2005-12   | 553            | 2005-12      | 2099-12    | 1129            |
| 29 | HadGEM2-CC     | r3i1p1 | 1959-12     | 2005-12   | 553            | 2005-12      | 2099-12    | 1129            |
| 30 | HadGEM2-ES     | r1i1p1 | 1859-12     | 2005-11   | 1752           | 2005-12      | 2299-12    | 3529            |
| 31 | HadGEM2-ES     | r2i1p1 | 1859-12     | 2005-12   | 1753           | 2005-12      | 2100-11    | 1140            |
| 32 | MIROC5         | r1i1p1 | 1850-01     | 2012-12   | 1956           | 2006-01      | 2100-12    | 1140            |
| 33 | MIROC-ESM-CHEM | r1i1p1 | 1850-01     | 2005-12   | 1872           | 2006-01      | 2100-12    | 1140            |
| 34 | MIROC-ESM      | r1i1p1 | 1850-01     | 2005-12   | 1872           | 2006-01      | 2100-12    | 1140            |
| 35 | MPI-ESM-LR     | r1i1p1 | 1850-01     | 2005-12   | 1872           | 2006-01      | 2300-12    | 3540            |
| 36 | MPI-ESM-LR     | r2i1p1 | 1850-01     | 2005-12   | 1872           | 2006-01      | 2100-12    | 1140            |
| 37 | MPI-ESM-LR     | r3i1p1 | 1850-01     | 2005-12   | 1872           | 2006-01      | 2100-12    | 1140            |
| 38 | MPI-ESM-MR     | r1i1p1 | 1850-01     | 2005-12   | 1872           | 2006-01      | 2100-12    | 1140            |
| 39 | MRI-CGCM3      | r1i1p1 | 1850-01     | 2005-12   | 1872           | 2006-01      | 2100-12    | 1140            |
| 40 | NorESM1-M      | r1i1p1 | 1850-01     | 2005-12   | 1872           | 2006-01      | 2100-12    | 1140            |
| 41 | NorESM1-ME     | r1i1p1 | 1850-01     | 2005-12   | 1872           | 2006-01      | 2100-12    | 1140            |

<sup>1</sup>See <http://cmip-pcmdi.llnl.gov/cmip5/documents.html> for further details.

Supplementary Table 4: Information relating to the timing, location, and explosivity of 21st century volcanic eruptions with a Volcanic Explosivity Index (VEI)  $\geq 3$ . Note that DY (“Decimal Year”) is the eruption date expressed in decimal form.

|    | Volcano          | Abb. | Source <sup>1</sup> | Date <sup>2</sup> | DY <sup>3</sup> | Lat.   | Lon.    | VEI |
|----|------------------|------|---------------------|-------------------|-----------------|--------|---------|-----|
| 1  | Ulawun           | Ul   | N, V                | Sept. 29, 2000    | 2000.74         | 5.1°S  | 151.3°E | 4   |
| 2  | Shiveluch        | Sh   | V                   | May 22, 2001      | 2001.39         | 56.7°N | 161.4°E | 4?  |
| 3  | Ruang            | Ru   | N, V                | Sept. 25, 2002    | 2002.73         | 2.3°N  | 125.4°E | 4?  |
| 4  | Reventador       | Ra   | N, V                | Nov. 3, 2002      | 2002.83         | 0.1°S  | 77.7°W  | 4   |
| 5  | Anatahan         | At   | N                   | Apr. 12, 2004     | 2004.28         | 16.4°N | 145.7°E | 3?  |
| 6  | Manam            | Ma   | N, V                | Jan. 27, 2005     | 2005.07         | 4.1°S  | 145.0°E | 4   |
| 7  | Sierra Negra     | Si   | N                   | Oct. 22, 2005     | 2005.81         | 0.8°S  | 91.2°W  | 3   |
| 8  | Soufrière Hills  | So   | N, V                | May 20, 2006      | 2006.38         | 16.7°N | 62.2°W  | 4?  |
| 9  | Tavurvur         | Ta   | N, V                | Oct. 7, 2006      | 2006.76         | 4.3°S  | 152.2°E | 4?  |
| 10 | Jebel at Tair    | Jb   | N                   | Sep. 30, 2007     | 2007.75         | 15.6°N | 41.8°E  | 3?  |
| 11 | Chaitén          | Ch   | N, V                | May 2, 2008       | 2008.34         | 42.8°S | 72.6°W  | 4   |
| 12 | Okmok            | Ok   | N, V                | Jul. 12, 2008     | 2008.53         | 53.4°N | 168.1°W | 4   |
| 13 | Kasatochi        | Ka   | N, V                | Aug. 7, 2008      | 2008.60         | 52.2°N | 175.5°W | 4   |
| 14 | Sarychev         | Sa   | N, V                | Jun. 12, 2009     | 2009.44         | 48.1°N | 153.2°E | 4?  |
| 15 | Eyjafjallajökull | Ey   | U                   | Apr. 14, 2010     | 2010.28         | 63.6°N | 19.6°W  | 4   |
| 16 | Merapi           | Me   | U                   | Oct. 26, 2010     | 2010.82         | 7.5°S  | 110.4°E | 4   |
| 17 | Nabro            | Na   | B                   | Jun. 13, 2011     | 2011.45         | 13.4°N | 41.7°E  | ?   |

<sup>1</sup>Sources of information are: Neely *et al.*, 2013 (N) (ref. 25); Vernier *et al.*, 2011 (V) (ref. 24); Bourassa *et al.*, 2012 (B) (ref. 31), and U.S. Geological Survey (U). Information from the latter source was available at <http://www.volcano.si.edu/reports/usgs/>.

<sup>2</sup>For some volcanic events (such as Shiveluch in 2001 and Eyjafjallajökull in 2010), there is ambiguity in estimating the exact eruption date.

<sup>3</sup>The “decimal year” (ref. 25) is the total number of days from the beginning of the year to the eruption date, divided by 365 (366 for leap years).
